# Supplementary material
Source: ML conference proceedings conference paper supplement (https://openreview.net/forum?id=MRYuRHsHzK4)
Supplement: supplementary_material [file attachment]

## A Experiments

### A.1 Datasets and downstream tasks

**Pre-training datasets.** AP\_NF is collected from the Deep Graph Library package [38] with 73832 nodes in total. It is composed of “computer”, “photo” datasets from dgl.data.AmazonCoBuy and “cs”, “physics” datasets from dgl.data.Coauthor. SocL\_NF is collected from TUDataset [20] with 156754 graphs in total, which is composed of REDDIT-MULTI-12K, dblp\_ct1, dblp\_ct2, facebook\_ct1, facebook\_ct2, github\_stargazers, highschool\_ct1, highschool\_ct2, infectious\_ct1, infectious\_ct2, tumblr\_ct1, tumblr\_ct2 and twitch\_egos. SocS\_NF is also collected from TUDataset [20] with 14500 graphs in total, which is composed of IMDB-BINARY, IMDB-MULTI, REDDIT-BINARY, REDDITMULTI-5K and COLLAB<sup>4</sup>. MolD is composed of 2000000 unlabeled molecular graphs sampled from ZINC15 [32], the same pre-training dataset used in [15]. The pre-training datasets are also summarized in Table 9.

**Downstream datasets.** For downstream evaluation on molecular graphs, we use 7 benchmark datasets from MoleculeNet [39]<sup>5</sup>. Details of such datasets are presented in Table 10. For dataset split, we adopt the scaffold splitting [3] with the ratio for train/validation/test as 8:1:1. It is a more realistic method for molecular property prediction compared with random splitting and is also the one used in [15, 42]. For downstream evaluation on social graph datasets, we use 4 datasets<sup>6</sup> from Yanardag and Vishwanathan [41]. Details about them are summarized in Table 11. As for dataset splitting method, for each dataset we first split it into train/test sets with the ratio 9:1 and then split the train set into train/validation sets with the ratio 8:1. The validation set is used for model selection. Note that it is different from the splitting method used in GCC[26], where the dataset is randomly split into train/test sets with the ratio 9:1. For downstream node classification datasets, we obtain them (i.e., US-Airport and H-index) from the download link<sup>7</sup> for the downstream datasets provided by the author of [26]. Three different versions of the dataset H-index are provided by the author, among which we use the one named “rand20intop200\_5000”, which is the same version with the one used in their evaluation process [26]. The way to split those datasets is also kept the same with the one used in [26] (i.e., split into train/test with the ratio 9:1 randomly).

### A.2 Implementation Details

#### A.2.1 Pre-training Configuration

For the fair comparison with other baselines, We use the Graph Isomorphism Network (GIN) [40] with 5 layers and 300 hidden units each layer as our backbones for models pre-trained on all those datasets mentioned above except for AP\_NF(whose settings are kept the same with GCC [26]), and mean-pooling to get graph-level representations following [15].

All the pre-training experiments are conducted on a CentOS server equipped with two Intel(R) Xeon(R) Gold 5120 CPU (2.20GHz) and 504G RAM and 8 NVIDIA 32510MiB GPUs. All models are implemented by PyTorch [22] version 1.4.0, DGL [37] with CUDA version 10.1, PyTorch Geometric [9] version 1.4.3, RDKit [8] version 2020.03.2, scikit-learn version 0.22.1 and Python 3.6.10. Information of other packages (like torch\_scatter) is presented with the code provided.

For SocL\_NF and SocS\_NF pre-training, we train for 171465 steps with 32 graphs in each batch. For AP\_NF pre-training, we train for 230800 steps with 32 RWR induced subgraphs in each batch and keep other pre-training settings the same with those used in GCC (Moco) pre-training process stated in [26]. For MolD pre-training, HGC and HGC\_AdaM have two versions using those two sampling strategies stated in Section 4.2 respectively (first-order neighbourhood sampling termed by FO and high-order graph sampling termed by HO). Details of the hyper-parameters for different strategies are listed in Table 6 (for models using GIN as their backbones) and Table 7 (for models using GCN or GraphSAGE as their backbones). Results for time consumption comparison between HGC, AdaM

<sup>4</sup> All datasets from TUDataset can be downloaded from <https://chrsmrrs.github.io/datasets/docs/home/>.

<sup>5</sup> All of those datasets can be downloaded from <http://moleculenet.ai/datasets-1>.

<sup>6</sup> All of them can be downloaded from <https://chrsmrrs.github.io/datasets/docs/datasets/>.

<sup>7</sup> <https://drive.google.com/open?id=12kmPV3XjVufxbIVNx5BQR-CFM9SmaFvM>

Table 6: Detailed hyper-parameter settings in pre-training stage for models with GIN as their backbones on the molecular dataset. For abbreviations used, “lr” denotes “learning rate”; “PS” denotes “Positive samples”; “NS” denotes “negative samples”; HA is short for HGC\_AdaM. H is short for HGC.

|                    | AdaM   | H (FO) | H (HO) | HA (FO) | HA (HO) |
|--------------------|--------|--------|--------|---------|---------|
| Batch size         | 256    | 256    | 256    | 256     | 256     |
| Temperature $\tau$ | -      | 0.07   | 0.07   | 0.07    | 0.07    |
| Training steps     | 781300 | 156260 | 156260 | 156260  | 156260  |
| Warmup steps       | 78130  | 15626  | 15626  | 15626   | 15626   |
| Initial lr         | 0.001  | 0.001  | 0.001  | 0.001   | 0.001   |
| #GNN layers        | 5      | 5      | 5      | 5       | 5       |
| GNN Hidden size    | 300    | 300    | 300    | 300     | 300     |
| Weight decay       | 0      | 0      | 0      | 0       | 0       |
| Adam $\beta_1$     | 0.9    | 0.9    | 0.9    | 0.9     | 0.9     |
| Adam $\beta_2$     | 0.999  | 0.999  | 0.999  | 0.999   | 0.999   |
| Gradient clipping  | 1.0    | 1.0    | 1.0    | 1.0     | 1.0     |
| Dropout rate       | 0.0    | 0.0    | 0.0    | 0.0     | 0.0     |
| Walk length        | -      | 1      | 2      | 1       | 2       |
| #Walks             | -      | 1      | 5      | 1       | 5       |
| Mask ratio         | 0.15   | -      | -      | 0.15    | 0.15    |
| Mask times         | 5      | -      | -      | 3       | 5       |
| #PS                | -      | 3      | 5      | 3       | 5       |
| #NS                | -      | 255    | 255    | 255     | 255     |

Table 7: Detailed hyper-parameter settings in pre-training stage for models with GCN or GraphSAGE as their backbones on the molecular dataset. Only those which are different from hyper-parameter settings of models using GIN as their backbones are presented.

|             | AdaM | H (FO) | H (HO) | HA (FO) | HA (HO) |
|-------------|------|--------|--------|---------|---------|
| Walk length | -    | 1      | 4      | 1       | 2       |
| #Walks      | -    | 1      | 7      | 1       | 5       |

Table 8: Hyper-parameter in fine-tuning stage and their search space.

| Hyper-parameter            | Range                         |
|----------------------------|-------------------------------|
| Learning rate              | 0.0001~0.01                   |
| Batch size                 | 32,64,128,256                 |
| Dropout ratio              | 0,0.1,0.2,0.3,0.4,0.5,0.6,0.7 |
| Learning rate scale        | 0.7,0.8,0.9,1.0,1.1,1.2,1.3   |
| Graph pooling method       | mean, sum                     |
| Feature combination method | last                          |
| #Training epochs           | 100                           |

and basic pre-training strategies are presented with the code provided (see “README.md” file under the “supp\_code” folder).

### A.2.2 Fine-tuning Configuration

**Fine-tuning evaluation process details.** For node classification tasks using the model pre-trained on AP\_NF, we adopt the same settings stated in [26] for a fair comparison (i.e. Adam [18] optimizer with learning rate 0.005, learning rate warms up over the first 3 epochs, and linearly decays after 3 epochs). Micro F1-scores on test set after 100 training epochs are reported. For molecular graph classification tasks and social network graph classification tasks, we apply a linear classification layer on top of the pre-trained model, taking pooled graph representations (mean-pooling in our models) as input and output the graph class prediction results. we finetune the pre-trained model for 100 epochs on the train set and report the ROC-AUC (for molecular graph) and micro F1-score

Table 9: Detailed information of pre-training datasets.

| Dataset | #Graphs /Nodes | Data Sources                                                                                                                   |
|---------|----------------|--------------------------------------------------------------------------------------------------------------------------------|
| AP_NF   | 73832          | (“computers” and “photo”) from dgl.data.AmazonCoBuy, (“cs” and “physics”) from dgl.data.Coauthor                               |
| SocL_NF | 156754         | REDDIT-MULTI-12K, dblp_ct1&2, facebook_ct1&2, github_stargazers, highschool_ct1&2, infectious_ct1&2, tumblr_ct1&2, twitch_egos |
| SocS_NF | 14500          | IMDB-BINARY, IMDB-MULTI, REDDIT-BINARY, REDDITMULTI-5K, COLLAB                                                                 |
| MolD    | 2000000        | unlabeled molecules sampled from ZINC15 [32]                                                                                   |

Table 10: Detailed information of molecular graph downstream dataset.

| Dataset | #Tasks | #Compounds |
|---------|--------|------------|
| SIDER   | 27     | 1427       |
| ClinTox | 2      | 1478       |
| BACE    | 1      | 1513       |
| HIV     | 1      | 41127      |
| BBBP    | 1      | 2039       |
| Tox21   | 12     | 7831       |
| ToxCast | 617    | 8575       |

Table 11: Detailed information of downstream social graph datasets.

| Dataset                 | #graphs | #classes |
|-------------------------|---------|----------|
| IMDB-B (IMDB-BINARY)    | 1000    | 2        |
| IMDB-M (IMDB-MULTI)     | 1500    | 3        |
| RDT-B (REDDIT-BINARY)   | 2000    | 2        |
| RDT-M (REDDIT-MULTI-5K) | 5000    | 5        |

Table 12: Detailed experimental results for different models on molecular datasets. The numbers in brackets are the values of standard deviations.

| Backbone  | Strategy     | SIDER                      | ClinTox                    | BACE                       | HIV                        | BBBP                       | Tox21                      | ToxCast                    |
|-----------|--------------|----------------------------|----------------------------|----------------------------|----------------------------|----------------------------|----------------------------|----------------------------|
| GIN       | HGC(FO)      | 0.6333 <sub>(0.0121)</sub> | 0.7919 <sub>(0.0408)</sub> | 0.8442 <sub>(0.0138)</sub> | 0.7853 <sub>(0.0072)</sub> | 0.7217 <sub>(0.0042)</sub> | 0.7770 <sub>(0.0022)</sub> | 0.6520 <sub>(0.0052)</sub> |
|           | HGC(HO)      | 0.6237 <sub>(0.0077)</sub> | 0.8134 <sub>(0.0115)</sub> | 0.7982 <sub>(0.0201)</sub> | 0.7687 <sub>(0.0058)</sub> | 0.7200 <sub>(0.0082)</sub> | 0.7622 <sub>(0.0021)</sub> | 0.6379 <sub>(0.0066)</sub> |
|           | HGC_AdaM(FO) | 0.6118 <sub>(0.0110)</sub> | 0.7845 <sub>(0.0499)</sub> | 0.8428 <sub>(0.0064)</sub> | 0.7839 <sub>(0.0073)</sub> | 0.7118 <sub>(0.0082)</sub> | 0.7692 <sub>(0.0030)</sub> | 0.6537 <sub>(0.0030)</sub> |
|           | HGC_AdaM(HO) | 0.6183 <sub>(0.0063)</sub> | 0.7281 <sub>(0.0052)</sub> | 0.7927 <sub>(0.0187)</sub> | 0.7672 <sub>(0.0113)</sub> | 0.7172 <sub>(0.0052)</sub> | 0.7635 <sub>(0.0025)</sub> | 0.6459 <sub>(0.0038)</sub> |
| GCN       | HGC(FO)      | 0.6117 <sub>(0.0042)</sub> | 0.8638 <sub>(0.0051)</sub> | 0.8405 <sub>(0.0006)</sub> | 0.7724 <sub>(0.0206)</sub> | 0.7047 <sub>(0.0031)</sub> | 0.7581 <sub>(0.0026)</sub> | 0.6490 <sub>(0.0024)</sub> |
|           | HGC(HO)      | 0.6243 <sub>(0.0044)</sub> | 0.8359 <sub>(0.0295)</sub> | 0.8000 <sub>(0.0065)</sub> | 0.7700 <sub>(0.0029)</sub> | 0.7168 <sub>(0.0014)</sub> | 0.7552 <sub>(0.0033)</sub> | 0.6421 <sub>(0.0022)</sub> |
|           | HGC_AdaM(FO) | 0.6164 <sub>(0.0103)</sub> | 0.8231 <sub>(0.0325)</sub> | 0.8083 <sub>(0.0072)</sub> | 0.7946 <sub>(0.0102)</sub> | 0.7189 <sub>(0.0103)</sub> | 0.7636 <sub>(0.0070)</sub> | 0.6525 <sub>(0.0025)</sub> |
|           | HGC_AdaM(HO) | 0.6108 <sub>(0.0037)</sub> | 0.7801 <sub>(0.0313)</sub> | 0.8249 <sub>(0.0059)</sub> | 0.7701 <sub>(0.0060)</sub> | 0.7006 <sub>(0.0021)</sub> | 0.7601 <sub>(0.0017)</sub> | 0.6426 <sub>(0.0021)</sub> |
| GraphSAGE | HGC(FO)      | 0.6286 <sub>(0.0016)</sub> | 0.7395 <sub>(0.0284)</sub> | 0.8368 <sub>(0.0008)</sub> | 0.7583 <sub>(0.0074)</sub> | 0.7100 <sub>(0.0016)</sub> | 0.7575 <sub>(0.0014)</sub> | 0.6505 <sub>(0.0004)</sub> |
|           | HGC(HO)      | 0.6130 <sub>(0.0089)</sub> | 0.6242 <sub>(0.0466)</sub> | 0.7321 <sub>(0.0084)</sub> | 0.7722 <sub>(0.0149)</sub> | 0.7129 <sub>(0.0153)</sub> | 0.7583 <sub>(0.0012)</sub> | 0.6379 <sub>(0.0066)</sub> |
|           | HGC_AdaM(FO) | 0.6115 <sub>(0.0040)</sub> | 0.7164 <sub>(0.0231)</sub> | 0.7741 <sub>(0.0061)</sub> | 0.7708 <sub>(0.0053)</sub> | 0.6951 <sub>(0.0287)</sub> | 0.7379 <sub>(0.0062)</sub> | 0.6423 <sub>(0.0009)</sub> |
|           | HGC_AdaM(HO) | 0.6250 <sub>(0.0029)</sub> | 0.8127 <sub>(0.0213)</sub> | 0.7812 <sub>(0.0038)</sub> | 0.7661 <sub>(0.0085)</sub> | 0.7187 <sub>(0.0019)</sub> | 0.7610 <sub>(0.0008)</sub> | 0.6442 <sub>(0.0018)</sub> |

(for social graph) on the test set at the best validation epoch. We apply three independent randomly initialized runs on each dataset and report the mean (and also standard deviation for molecular graph classification). For social network classification tasks (whether the model is trained on molecular graph dataset presented in Table 5 or social network graph dataset presented in both Table 5 and Table 2), we use the Adam optimizer with learning rate 0.001, weight decay 0,  $\beta_1 = 0.9$ ,  $\beta_2 = 0.999$ , batch size 32 and learning rate scale for the linear classification layer 1.0. No hyper-parameter search

is performed<sup>8</sup>. We finetune the pre-trained model for 100 epochs on the train set and report the micro F1-score on the test set at the best validation epoch. For hyper-parameters in the molecular graph fine-tuning process, we use PBT [16] algorithm to search the best combination on the prediction ROC-AUC on the validation set. Details of hyper-parameter search process will be discussed later.

**Software and hardware configuration** Versions of software used in fine-tuning stage are slightly different from those used in the pre-training stage, i.e., Python 3.7.6, Pytorch 1.4.0, DGL 0.5.3, scikit-learn 0.22.1 for the model trained on AP\_NF fine-tuning and Python 3.6.8, Pytorch 1.5.0, Pytorch Geometric 1.6.1, scikit-learn 0.23.2 for fine-tuning other models.

All the fine-tuning experiments are run on a single P40 GPU.

**Hyper-parameter selection.** For each molecular graph classification task, we use PBT [16] algorithm to search for the best hyper-parameter combination on the prediction ROC-AUC on the validation set with the initial trail number set to 10, parallel trail number 10, maximum trail number 400, mix range 0.3, niche  $\sigma$  0.1, niche  $\alpha$  1.0, perturb factor 0.0001 for continuous parameter (i.e., learning rate). Table 8 shows all the hyper-parameters and their search space in the fine-tuning stage. Search results can be found together with the code provided (see “README.md” file under the “supp\_code” folder for further instructions).

### A.3 Baselines

#### A.3.1 Molecular Graph Classification

**Hu. et al. [15]** Four of the pre-training strategies from Table 1 (i.e., Edge\_Pred, Infomax, Attr\_Mask, Context\_Pred) are proposed in [15]. We download the author’s code and pre-trained models that are released officially and apply three independent runs on each downstream fine-tuning dataset using hyper-parameter combinations provided by the authors (i.e., learning rate = 0.001, dropout rate = 0.5, batch size = 32).

Code: <https://github.com/snap-stanford/pretrain-gnns>

**GraphCL [42].** We download the author’s code released officially and use the weights of the pre-trained model they provide (i.e., graphcl\_80.pth). We apply three independent runs on each downstream fine-tuning dataset using the hyper-parameters provided by the authors (i.e., learning rate = 0.001, dropout rate = 0.5, batch size = 32, number of training epochs = 100, learning rate scale for the linear classification layer = 1.0).

Code: <https://github.com/Shen-Lab/GraphCL>

**C\_Subgraph [26].** We download the code of [26] released by the authors officially. Since their implementation cannot be used in both our molecular graph pre-training stage as well as the downstream molecular graph classification stage directly, we carefully implement their graph sampling strategy, keeping the restart probability and the walk length same with their default settings (i.e., restart probability = 0.8, walk length is determined by a fixed number and the node’s degree, the difference is that we would perform such RWR process for several times to sample enough nodes due to the different version of DGL we use from GCC (see A.2.1)) and use it to pre-train our model using the same pre-training settings with our HGC pre-training stage. The downstream evaluation process is kept the same with those for our model (on molecular graph classification datasets).

Code: <https://github.com/THUDM/GCC>

#### A.3.2 Node Classification & Social Network Graph Classification

All the results of the baselines presented in Table 3 and Table 2 are taken directly from the paper [26], since the test set selection process and the evaluation metric (i.e., micro F1-score) are kept the same with [26] and that we carefully check the author’s description and implementation details of the baselines used in their paper and choose to trust in their implementation and evaluation for those baselines.

---

<sup>8</sup>We take the entire graphs as our graph instances in our evaluation process, different from RWR induced subgraphs in the evaluation process of GCC [26].

## 704 A.4 Details about Experimental Setup

### 705 A.4.1 Two-step hierarchical graph construction process

706 We adopt a two-step approaches to construct the hierarchical graph:

- 707 • **Candidate selection:** We first sort graphs in the dataset by molecular weight (calculated by  
708 MolWt( $\cdot$ ) function in the software RDKit [8]) for molecular graphs or number of nodes for graphs  
709 without node features. For molecular graphs, we select molecule B as A’s candidates if and only  
710 if: 1). The molecular weights of A and B differ by no more than 10% of A; 2). The number of  
711 rings of A and B differs by no more than 1; 3). The number of atoms in A and B differs by no  
712 more than 7; 4). The number of candidates have been selected is still less than a manually defined  
713 value (70 in our pre-processing). For graphs without node attributes, we select graph A as graph  
714 B’s candidate if and only if: 1). The number of nodes of A and B differ by no more than 10%. 2).  
715 The number of edges of A and B differs no more than 10%. 3). The number of candidates have  
716 been selected is still less than a manually defined value (70 in our pre-processing).
- 717 • **Edge construction:** For each graph A in graph B’s candidate set, we calculate their similarity  
718 score and build an edge between them in the constructing hierarchical graph if their similarity  
719 score is above a pre-defined threshold  $\tau$ .

### 720 A.4.2 Details of adaptive masking process

721 **Detailed algorithms.** The main algorithm of the adaptive masking (AdaM) process is summarized  
722 in Algorithm 1. Details of its sub-algorithm – PScore is demonstrated in Algorithm 2, where  
723 MASKNODE( $G, \mathcal{S}$ ) takes a graph  $G$  and a node set for masking  $\mathcal{S}$  as input and outputs a graph  $G'$   
724 with attributes of nodes in  $\mathcal{S}$  masked.

725 **Examples.** An example regarding to the adaptive masking process is illustrated in Fig. 3. A toy  
726 example mentioned in Sec. 4.4 claiming that the uniform selection strategy may break structural  
727 relations among nodes in graphs is: suppose that node  $v$  has only one neighbor: node  $u$ . In this  
728 case, if we mask all features of  $u$  and  $v$  simultaneously, it is very hard for model  $\mathcal{M}$  to make a  
729 good prediction of  $v$  since  $v$  is highly related to  $u$ . In other words,  $\mathcal{M}$  cannot encode the attribute  
730 distribution of  $v$ . Therefore, a good masking set should have less correlations with respective to the  
731 output of the model  $\mathcal{M}$ .

---

#### Algorithm 1 Adaptive Masking.

---

**Input:** Input graph  $G(\mathcal{V}, \mathcal{E}, \mathbf{X})$ ; The model  $\mathcal{M}$ ; Masking steps  $T$ ; The number of nodes for masking at each step  $\alpha$ .

**Output:** Masked node set  $\mathcal{S}$ ;

- 1:  $\mathcal{S} \leftarrow \emptyset$
- 2:  $\mathcal{S}_{prev} \leftarrow \emptyset$
- 3: **for**  $t = 1$  to  $T$  **do**
- 4:   **if**  $t == 1$  **then**
- 5:     Randomly select a node set  $\mathcal{K}$  with  $\alpha$  nodes from  $\mathcal{V}$  with a uniform distribution.
- 6:   **else**
- 7:     **for**  $v \in \mathcal{V} \setminus \mathcal{S}$  **do**
- 8:        $s_v \leftarrow \text{PScore}(v, \mathcal{M}, G, \mathcal{S}, \mathcal{S}_{prev})$
- 9:     Randomly select a node set  $\mathcal{K}$  with  $\alpha$  nodes from  $\mathcal{V} \setminus \mathcal{S}$  with probability for each node  $v$  :

$$p_v = \frac{s_v}{\sum_{u \in \mathcal{V} \setminus \mathcal{S}} s_u}$$

- 10:    $\mathcal{S}_{prev} \leftarrow \mathcal{S}$
  - 11:    $\mathcal{S} \leftarrow \mathcal{S} \cup \mathcal{K}$
  - 12: **return**  $\mathcal{S}$
-

---

**Algorithm 2** PScore.

---

**Input:** Target node  $v$ ; The model  $\mathcal{M}$ ; Input graph  $G(\mathcal{V}, \mathcal{E}, \mathcal{X})$ ; Current masked node set  $\mathcal{S}_{\text{cur}}$ ; Previous masked node set  $\mathcal{S}_{\text{prev}}$ ;  
1:  $G_{\text{prev}} \leftarrow \text{MASKNODE}(G, \mathcal{S}_{\text{prev}})$ ;  
2:  $G_{\text{cur}} \leftarrow \text{MASKNODE}(G, \mathcal{S}_{\text{cur}})$ ;  
3:  $\mathbf{y}_{v, \text{prev}} \leftarrow \mathcal{M}(v, G_{\text{prev}})$ ;  
4:  $\mathbf{y}_{v, \text{cur}} \leftarrow \mathcal{M}(v, G_{\text{cur}})$ ;  
5:  $s \leftarrow 1 - \text{cross\_entropy}(\mathbf{y}_{v, \text{prev}}, \mathbf{y}_{v, \text{cur}})$ ;  
6: **return**  $s$ ;

---

### A.4.3 Time Consumption for Pre-processing

No more than 4 hours for MolD and about 2 hours for SocL\_NF, details are presented with code provided (see “README.md” file under the “supp\_code” folder).

## A.5 Additional Experimental Results

### A.5.1 More experimental results for the influence of data augmentations on the quality of positive instances

We present more experimental results w.r.t. how the quality of resulting positive instances is influenced by data augmentation methods applied. This part is to support the claim made in Sec. 1 that popular data augmentation strategies cannot get positive graph instances with ideal properties preserved for various kinds of graph data in addition to Fig. 1.

The claim that the constructed similarity based hierarchical graph encodes the similarity hierarchy is reasonable and can be supported by statistical results for average similarity scores between the target graph instances and their neighbouring graph instances in different hops. As shown in Fig. 4, the average fingerprint similarity score between molecules in different hops and the target graph instance decreases as the hop increases. Moreover, the decreasing speed is relatively low compared with the decreasing speed of the average similarity scores between the positive instances obtained by graph data augmentation strategies and the target graph instance w.r.t. the augmentation ratio (e.g. Fig. 1).

**Analysis for graph sampling (subgraph) strategy on molecular graphs.** Graph sampling data augmentation strategy samples subgraphs as positive instances for the target graph instance. It is an effective strategy for graphs with no node/edge attributes [26]. Admittedly, perhaps it can also get subgraphs that are structurally similar enough (measured by Weisfeiler-Lehman Graph Kernel normalized similarity) with each other whether for those graphs with node/edge attributes. It can hardly maintain specific domain information that is important for some kinds of graph data (e.g., molecular graphs) or cannot guarantee enough semantic similarity between obtained positive graph instances and the original graph instance. We use the code for subgraph sampling provided by [42] to investigate further. We discover that 1). subgraphs cannot preserve enough semantic similarity (measured by fingerprint similarity scores) between obtained positive instances and the target graph instance for molecular graphs; 2). sampled subgraphs may not be proper molecules anymore. Statistical results calculated on 1000 molecules randomly sampled from our molecular pre-training dataset when the subgraph sampling ratio is relatively low ( $\leq 0.25$ ) and relatively high (up to 0.8) are presented in Table 13 and Table 14 respectively. Perhaps it is surprising that the fingerprint similarity scores between two sampled subgraphs still remain at a low level even when the data augmentation ratio is relatively high (i.e. up to 0.8).

**Analysis for attribute masking strategy on molecular graphs.** We also observe similar phenomenon for attribute masking strategy when applied on molecules. As shown in Table 15, the

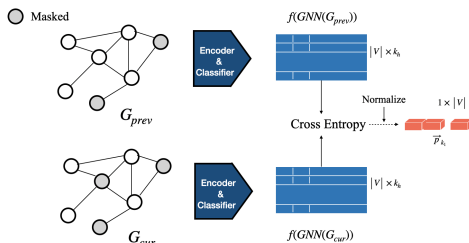

Figure 3: A toy example to illustrate how we determine the masking probability in each masking step (i.e.,  $k_1$ -th), assuming that  $k_1 > 2$ .

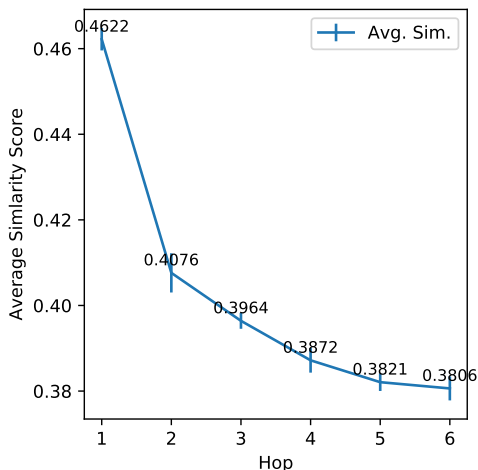

Figure 4: The fingerprint similarity scores between graph instances in the hierarchical graph and the target graph instance w.r.t. the number of hops. Calculated on 1000 randomly selected molecules from MolD. Three independent runs were given, with average similarity scores and standard deviation reported.

Table 13: Statistical results for the ratio of sampled subgraphs to be proper molecules and their similarity scores with the target molecule w.r.t. subgraph sampling ratio. Calculated on 1000 molecules randomly sampled from MolD. Three independent runs were given, with mean and standard deviation values reported. This table presents results when the subgraph sampling ratio is relatively low. Values presented in the table have the format mean  $\pm$  std.

|                              | 0.10                  | 0.15                  | 0.20                  | 0.25                  |
|------------------------------|-----------------------|-----------------------|-----------------------|-----------------------|
| Ratio to be proper molecules | 0.511 $\pm$ 0.011     | 0.456 $\pm$ 0.005     | 0.477 $\pm$ 0.034     | 0.522 $\pm$ 0.028     |
| Similarity scores            | 0.00239 $\pm$ 0.00008 | 0.00292 $\pm$ 0.00007 | 0.00296 $\pm$ 0.00010 | 0.00235 $\pm$ 0.00003 |

average similarity score between the resulted positive graph instances and their original graph instance drops as the attribute masking ratio increases, which is not a surprising phenomenon. However, unlike the graph sampling strategy, attribute masking strategy always fail to get masked graphs that are legal molecules, perhaps due to the loss of node attributes which are important for molecules.

#### Analysis for the effectiveness of graph data augmentation strategies on social network graphs.

We also investigate into how common graph data augmentation strategies will influence the resulting positive instances' similarity scores with the target graph instances when applied on social network graphs. The results are shown in Fig. 5 for dropping nodes and dropping edge strategies and Fig. 6 for subgraph augmentation strategy. The experiment is conducted on 1000 graph instances uniformly randomly chosen from our SocL\_NF dataset. Three independent experiments are performed with the average and standard deviation value of the average similarity score over such 1000 graph instances in each run are reported. The similarity score measurement is Weisfeiler-Lehman Graph Kernel normalized similarity provided by Python Package GraKel [31]. Compared with the average similarity between the target graph instance and its first-order graph instances in the constructed hierarchical graph, which is 0.3467, such two data augmentation strategies cannot get positive graph instances that are similar enough with the target instance even when the data augmentation ratio is relatively low (e.g. 0.1). Moreover, the average similarity score drops obviously as the augmentation ratio increases, which is not a surprising phenomenon.

Table 14: Statistical results for the ratio of sampled subgraphs to be proper molecules and their similarity scores with the target molecule w.r.t. subgraph sampling ratio. Calculated on 1000 molecules randomly sampled from MolD. Three independent runs were given, with mean and standard deviation values reported. This table presents results when the subgraph sampling ratio is relatively high. Values presented in the table have the format mean  $\pm$  std.

|                              | 0.50                  | 0.70                  | 0.80                  |
|------------------------------|-----------------------|-----------------------|-----------------------|
| Ratio to be proper molecules | 0.511 $\pm$ 0.012     | 0.515 $\pm$ 0.001     | 0.506 $\pm$ 0.014     |
| Similarity scores            | 0.00211 $\pm$ 0.00004 | 0.00219 $\pm$ 0.00008 | 0.00223 $\pm$ 0.00001 |

Table 15: Statistical results for the ratio of the resulting masked graphs to be proper molecules and their similarity scores with their respective original molecules w.r.t. attribute masking ratio. Calculated on 1000 molecules randomly sampled from our pre-training dataset. Three independent runs were given, with mean and standard deviation values reported.

|                              | 0.10              | 0.15              | 0.20              | 0.25              |
|------------------------------|-------------------|-------------------|-------------------|-------------------|
| Ratio to be proper molecules | $0.014 \pm 0.002$ | $0.015 \pm 0.003$ | $0.014 \pm 0.002$ | $0.014 \pm 0.003$ |
| Similarity scores            | $0.472 \pm 0.004$ | $0.414 \pm 0.001$ | $0.378 \pm 0.003$ | $0.359 \pm 0.002$ |

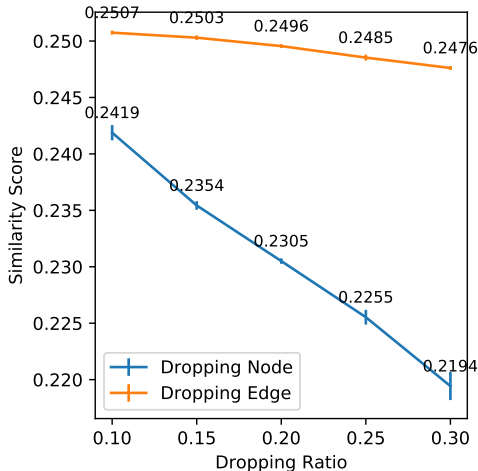

Figure 5: The Weisfeiler-Lehman Graph Kernel normalized similarity scores between positive graph instances, obtained by applying dropping nodes or dropping edges data augmentation strategies, and their respective target graph instances w.r.t. augmentation ratio. Three independent runs were given, with average similarity scores and standard deviation values reported.

792 As for the subgraph augmentation strategy, it can be seen that the average similarity score lies in  
793 a low level for both low and high augmentation ratio. Such phenomenon is similar with the one  
794 observed on molecular graphs.

#### 795 A.6 Additional ablation study of the effectiveness of pre-training strategies on GCN and 796 GraphSAGE

797 Similar with the effectiveness of our pre-training strategies (HGC and AdaM) for GIN models, we  
798 can also observe significant contribution of our pre-training strategies on other backbones (GCN

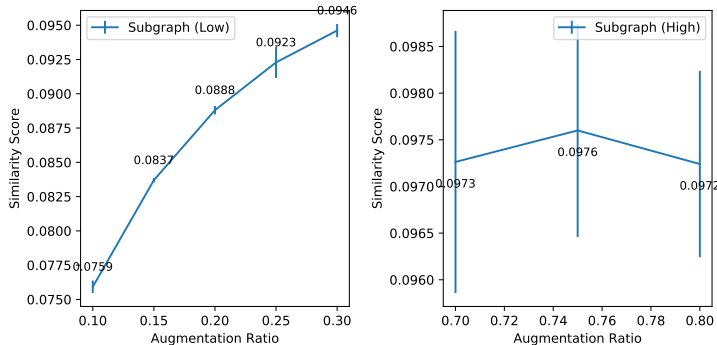

Figure 6: The Weisfeiler-Lehman Graph Kernel normalized similarity scores between positive graph instances, obtained by applying the subgraph data augmentation strategy, and their respective target graph instances w.r.t. subgraph augmentation ratio. Left: changing curve of the average similarity score w.r.t. data augmentation ratio (relatively low). Right: changing curve of the average similarity score w.r.t. data augmentation ratio (relatively high). Three independent runs were given, with average similarity scores and standard deviation values reported.



Table 16: Effectiveness of the pre-training on GCN and GraphSAGE (denoted as “SAGE” in brackets). Bold numbers for absolute improvements larger than 0.05. For abbreviations used, “No-Pret.” denotes trained-from-scratch models, “Pret.” denotes pre-trained models (presented are the best values achieved by our different pre-training strategies for each downstream evaluation dataset), “Abs. Imp.” denotes the absolute ROC-AUC improvement.

|         | No-Pret. (GCN) | Pret. (GCN) | Abs. Imp. (GCN) | No-Pret. (SAGE) | Pret. (SAGE) | Abs. Imp. (SAGE) |
|---------|----------------|-------------|-----------------|-----------------|--------------|------------------|
| SIDER   | 0.6072         | 0.6243      | +0.0171         | 0.6173          | 0.6286       | +0.0113          |
| ClinTox | 0.5866         | 0.8638      | <b>+0.2772</b>  | 0.6936          | 0.8127       | <b>+0.1191</b>   |
| BACE    | 0.7652         | 0.8405      | <b>+0.0753</b>  | 0.7285          | 0.8368       | <b>+0.1083</b>   |
| HIV     | 0.7547         | 0.7946      | +0.0399         | 0.7477          | 0.7730       | +0.0253          |
| BBBP    | 0.6758         | 0.7189      | +0.0431         | 0.6826          | 0.7187       | +0.0361          |
| Tox21   | 0.7370         | 0.7636      | +0.0266         | 0.7609          | 0.7643       | +0.0034          |
| ToxCast | 0.6394         | 0.6525      | +0.0131         | 0.6395          | 0.6505       | +0.0110          |

Table 17: The average minimum distances between nodes masked by the random masking strategy and our adaptive making strategy with different masking times  $k$ . Presented are the mean of the values calculated over the first five epochs.

|           | RdM    | $k = 3$ | $k = 5$ | $k = 6$ | $k = 7$ |
|-----------|--------|---------|---------|---------|---------|
| Avg. Dis. | 2.7519 | 2.7584  | 2.7623  | 2.7625  | 2.7670  |

and GraphSAGE) as shown in Table 16. We can arrive at a conclusion, which is similar with the one made in [15], that more powerful backbone can benefit more from pre-training by comparing Table 16 with Table 4. Besides, pre-trained GCN models can get larger benefit on the dataset BACE (27.72% absolute improvement) compared with the improvement made by pre-trained GIN (16.54%) and GraphSAGE (10.83%).

## A.7 Additional understanding and analysis for adaptive masking strategy

To evaluate the effectiveness of the proposed adaptive masking strategy, we compare the performance of GIN pre-trained by two different masking strategies (i.e., the uniform random masking strategy, denoted as RdM and the adaptive masking strategy AdaM) on molecular classification datasets and summarize them in Table 18. It can be seen that when using AdaM to select nodes to mask, the mask-and-predict paradigm may probably help the model learn more inherent graph-level molecular properties, thus getting better performance in downstream tasks (e.g., with maximum absolute ROC-AUC increase 11.4% for the dataset ClinTox and 3.80% in average over all of the molecular datasets).

Therefore, we want to ask that what does AdaM bring to us, or what makes it different from the random masking strategy? One intuition is that if nodes that are less disturbed had larger probabilities to be masked in the current masking step, then nodes selected by AdaM will be distributed more evenly in the graph than nodes chosen by RdM. For further investigation, we calculate the average minimum distances between masked nodes<sup>9</sup> when adopting RdM and AdaM with different masking steps ( $k$ ) over the first five training epochs in Table 17. All masking ratios are set to 15%. Two observations can be made from Table 17: 1). The average minimum distances between masked nodes chosen by AdaM are larger than those of RdM, which confirms our conjecture; 2). The average minimum distance between masked nodes grows as the masking times  $k$  increases. Hence, if we apply more masking steps, masked nodes will be more likely to distribute evenly over the molecule.

## B Further Analysis for Similarity-aware Sampling Strategy

In this section, we conduct some further analysis of the proposed similarity-aware sampling strategy. This section is to support Sec. 4.3.

### B.1 Approximate similarity function

The pre-training graph dataset can be divided into two sets for each graph instance  $G_i \in \mathcal{G}$  based on the ground-truth similarity function:  $\text{sim}_{\text{gt}}(\cdot, \cdot)$  and a graph instance  $G_i \in \mathcal{G}$ :  $\mathcal{G}_i^{\text{gt}+} =$

<sup>9</sup>For each node  $i$  in the masked nodes set  $\mathcal{N}_s$ , we calculate the minimum distance  $d_{\min}$  measured by the length of the shortest path between it and other nodes in the set (i.e.,  $d_{\min} = \min\{\text{dis}(i, j) | j \in \mathcal{N}_s, j \neq i\}$ ). Then the average value over all nodes in the masked nodes set is reported.

Table 18: Effectiveness of dynamic masking strategy v.s. uniformly random masking strategy. Bold numbers for those larger than 0.05.

|         | RdM    | AdaM   | Abs. Imp.      |
|---------|--------|--------|----------------|
| SIDER   | 0.5947 | 0.6164 | +0.0217        |
| ClinTox | 0.6685 | 0.7797 | <b>+0.1139</b> |
| BACE    | 0.8064 | 0.8224 | +0.0160        |
| HIV     | 0.7668 | 0.7704 | +0.0036        |
| BBBP    | 0.6316 | 0.7273 | <b>+0.0957</b> |
| Tox21   | 0.7657 | 0.7696 | +0.0039        |
| ToxCast | 0.6463 | 0.6603 | +0.0160        |

829  $\{G_k | \text{sim}_{\text{gt}}(G_i, G_k) = 1, G_k \in \mathcal{G}\}$ , containing  $G_i$ 's ground-truth positive instances and  $\mathcal{G}_i^{\text{gt}-} =$   
830  $\{G_k | \text{sim}_{\text{gt}}(G_i, G_k) = 0, G_k \in \mathcal{G}\}$ , containing  $G_i$ 's negative graph instances.

831 In practice, we use the approximate similarity function to approximate the ground-truth similarity  
832 function. We introduce the definition of such functions together with some reasonable properties  
833 assumed for their probability density functions over each  $\mathcal{G}_i^{\text{gt}+}$  and  $\mathcal{G}_i^{\text{gt}-}$  as follows:

834 **Definition 2** (Approximation similarity function). *For a similarity function  $\text{sim}(\cdot, \cdot)$  and a graph*  
835 *instance  $G_i \in \mathcal{G}$ , denote its similarity score distribution density function over  $G_i$ 's ground-truth*  
836 *positive instance set  $\mathcal{G}_i^{\text{gt}+}$  as  $f_i^+(\cdot)$  and that over  $\mathcal{G}_i^{\text{gt}-}$  as  $f_i^-(\cdot)$ . Two properties are assumed for*  
837  *$f_i^+(\cdot)$  and  $f_i^-(\cdot)$ : 1). Both  $f_i^+(\cdot)$  and  $f_i^-(\cdot)$  are first-order differentiable functions over their domain*  
838 *of definition  $[0, 1]$ ; 2). There exists a similarity score threshold  $0 < x_0 < 1$ , s.t. for all  $x_0 < x_1 < 1$ ,*  
839 *we have  $\int_{x_1}^1 f_i^+(x)dx > \int_{x_1}^1 f_i^-(x)dx$ .*

840 Some specific probability density functions can be found for  $f_i^+(\cdot)$  and  $f_i^-(\cdot)$  such as normal  
841 distribution probability density functions (truncated between  $[0, 1]$  and re-normalized by the integral  
842 over  $[0, 1]$ ) and beta distribution probability density functions, in which cases the above mentioned  
843 properties can be easily satisfied by further restricting the relationship between their parameters.

844 In our practice, another parameter – a similarity threshold  $\tau$  is introduced to divide the graph pre-  
845 training dataset  $\mathcal{G}$  into two sets for each  $G_i \in \mathcal{G}$ :  $\mathcal{G}_i^{\text{sim}+} = \{G_k | \text{sim}(G_i, G_k) \geq \tau, G_k \in \mathcal{G}\}$  and  
846  $\mathcal{G}_i^{\text{sim}-} = \{G_k | \text{sim}(G_i, G_k) < \tau, G_k \in \mathcal{G}\}$ .

## 847 B.2 Why we should avoid false-positive instances in the contrastive learning process?

848 A graph instance  $G_k$  is  $G_i$ 's false-positive instance if and only if  $G_k \in \mathcal{G}_i^{\text{sim}+} \wedge G_k \notin \mathcal{G}_i^{\text{gt}+}$ . It  
849 is intuitively correct that we should avoid such false-positive instances in the contrastive learning  
850 process. We investigate into such intuition by analyzing how false-positive instances would influence  
851 the contrastive training process in this section.

852 To get a glimpse into the training process, we start by introducing the loss function which is widely  
853 used in the contrastive learning process.

854 The contrastive learning loss  $\mathcal{L}$  is composed of losses from each graph instance in the pre-training  
855 dataset:

$$\mathcal{L} = \sum_{G_i \in \mathcal{G}} \mathcal{L}_i. \quad (3)$$

856 where  $G_i$  denotes a graph instance from the pre-training dataset. Moreover, we also use  $x_j$  to denote  
857 the same instance (with  $G_j$ ) in  $G_i$ 's positive sampling probability function  $P_i^+(\cdot)$ <sup>10</sup> as well as the  
858 negative instance sampling probability function  $P_i^-(\cdot)$  for simplicity. The actual value of  $\mathcal{L}_i$  in each  
859 training epoch may be different from each other, since it is determined by the selected positive graph  
860 instance  $G_i^+$  and each negative graph instance  $G_i^-$ . Thus, we use its expectation value here:

$$\mathbb{E}[\mathcal{L}_i] = -\mathbb{E}_{x_i^+ \sim P_i^+} \log \left[ \frac{\exp(z_i^T z_i^+ / \tau_t)}{\exp(z_i^T z_i^+ / \tau_t) + N \mathbb{E}_{x_i^- \sim P_i^-} \exp(z_i^T z_i^- / \tau_t)} \right], \quad (4)$$

<sup>10</sup>To be more specific,  $P_i^+(x_j)$  is the probability of sampling the graph instance  $G_j$  as graph instance  $G_i$ 's positive instance in the contrastive learning process.

where  $\tau_t$  is the temperature hyper-parameter,  $N$  is the number of negative instances sampled for each instance in one training epoch,  $z_i = \frac{w_i}{\|w_i\|_2} \in \mathbb{R}^{K \times 1}$  is the normalized representation vector of graph instance  $G_i$  with the feature dimension  $K$ ,  $w_i$  is the corresponding representation vector output by the neural network  $\|w_i\|_2$  is the 2-norm of  $w_i$ . Here, we assume that negative instances are chosen from a uniform distribution over the whole pre-training dataset, which means that  $P_i^-(x_j) = \frac{1}{|\mathcal{G}|}$  for each  $x_i \in \mathcal{G}$  and  $x_j \in \mathcal{G}$ . Thus, two partial derivatives of interest are as follows:

$$\mathbb{E} \left[ \frac{\partial \mathcal{L}_j}{\partial w_i} \right] = -P_j^+(x_i) \frac{1}{\tau_t \|w_i\|_2} (1 - z_i z_i^T) \left[ z_j - \frac{z_j \exp(z_j^T z_i / \tau_t) + \frac{N}{|\mathcal{G}|} z_j \exp(z_j^T z_i / \tau_t)}{\exp(z_j^T z_i / \tau_t) + \frac{N}{|\mathcal{G}|} \sum_{x_j^- \in \mathcal{G}} \exp(z_j^T z_j^- / \tau_t)} \right] \quad (5)$$

$$= -P_j^+(x_i) \frac{1}{\tau_t \|w_i\|_2} (z_j - (z_i^T z_j) z_i) \left[ \frac{\frac{N}{|\mathcal{G}|} \sum_{x_j^- \in \mathcal{G} \setminus \{x_i\}} \exp(z_j^T z_j^- / \tau_t)}{\exp(z_j^T z_i / \tau_t) + \frac{N}{|\mathcal{G}|} \sum_{x_j^- \in \mathcal{G}} \exp(z_j^T z_j^- / \tau_t)} \right] \quad (6)$$

Let

$$Q(x_j, x_i) = \frac{\frac{N}{|\mathcal{G}|} \sum_{x_j^- \in \mathcal{G} \setminus \{x_i\}} \exp(z_j^T z_j^- / \tau_t)}{\exp(z_j^T z_i / \tau_t) + \frac{N}{|\mathcal{G}|} \sum_{x_j^- \in \mathcal{G}} \exp(z_j^T z_j^- / \tau_t)} \quad (7)$$

$$P(x_j, x_i) = \frac{\frac{N}{|\mathcal{G}|} \exp(z_j^T z_i / \tau_t)}{\exp(z_j^T z_i / \tau_t) + \frac{N}{|\mathcal{G}|} \sum_{x_j^- \in \mathcal{G}} \exp(z_j^T z_j^- / \tau_t)}, \quad (8)$$

then we have:

$$\mathbb{E} \left[ \frac{\partial \mathcal{L}_j}{\partial w_i} \right] = -P_j^+(x_i) \frac{1}{\tau_t \|w_i\|_2} (z_j - (z_i^T z_j) z_i) Q(x_j, x_i) \quad (9)$$

As for  $\mathbb{E} \left[ \frac{\partial \mathcal{L}_i}{\partial w_i} \right]$ , we have:

$$\mathbb{E} \left[ \frac{\partial \mathcal{L}_i}{\partial w_i} \right] = -\frac{1}{\tau_t \|w_i\|_2} (1 - z_i z_i^T) \sum_{x_i^+ \in \mathcal{G}_i^+} P_i^+(x_i^+) \left( z_i^+ - \frac{z_i^+ \exp(z_i^T z_i^+ / \tau_t) + \frac{N}{|\mathcal{G}|} \sum_{x_i^- \in \mathcal{G}} z_i^- \exp(z_i^T z_i^- / \tau_t)}{\exp(z_i^T z_i^+ / \tau_t) + \frac{N}{|\mathcal{G}|} \sum_{x_i^- \in \mathcal{G}} \exp(z_i^T z_i^- / \tau_t)} \right) \quad (10)$$

$$= -\frac{1}{\tau_t \|w_i\|_2} (1 - z_i z_i^T) \sum_{x_i^+ \in \mathcal{G}_i^+} P_i^+(x_i^+) \left( z_i^+ (P(x_i, x_i^+) + Q(x_i, x_i^+)) - \sum_{x_i^- \in \mathcal{G}} z_i^- M^-(x_i, x_i^+, x_i^-) \right) \quad (11)$$

$$= -\frac{1}{\tau_t \|w_i\|_2} (1 - z_i z_i^T) \sum_{x_i^+ \in \mathcal{G}_i^+} P_i^+(x_i^+) (z_i^+ (P(x_i, x_i^+) + Q(x_i, x_i^+))) \quad (12)$$

$$+ \frac{1}{\tau_t \|w_i\|_2} (1 - z_i z_i^T) \sum_{x_i^- \in \mathcal{G}} z_i^- \left( \sum_{x_i^+ \in \mathcal{G}_i^+} P_i^+(x_i^+) M^-(x_i, x_i^+, x_i^-) \right) \quad (13)$$

$$= -\frac{1}{\tau_t \|w_i\|_2} (1 - z_i z_i^T) \sum_{x_i^+ \in \mathcal{G}_i^+} P_i^+(x_i^+) (z_i^+ (P(x_i, x_i^+) + Q(x_i, x_i^+))) \quad (14)$$

$$+ \frac{1}{\tau_t \|w_i\|_2} (1 - z_i z_i^T) \sum_{x_i^- \in \mathcal{G}} z_i^- M(x_i, x_i^-), \quad (15)$$

where

$$M^-(x_i, x_i^+, x_j) = \frac{\frac{N}{|\mathcal{G}|} \exp(z_i^T z_j / \tau_t)}{\exp(z_i^T z_i^+ / \tau_t) + \frac{N}{|\mathcal{G}|} \sum_{x_i^- \in \mathcal{G}} \exp(z_i^T z_i^- / \tau_t)}, \quad (16)$$

871  $M(x_i, x_j)$  is the weighted sum of  $M^-(x_i, x_i^+, x_j)$ , thus is the function of only  $x_i$  and  $x_j$ :

$$M(x_i, x_j) = \sum_{x_i^+ \in \mathcal{G}_i^+} P_i^+(x_i^+) \frac{\frac{N}{|\mathcal{G}|} \exp(z_i^T z_j / \tau_t)}{\exp(z_i^T z_i^+ / \tau_t) + \frac{N}{|\mathcal{G}|} \sum_{x_i^- \in \mathcal{G}} \exp(z_i^T z_i^- / \tau_t)} \quad (17)$$

$$= \sum_{x_i^+ \in \mathcal{G}_i^+} P_i^+(x_i^+) M^-(x_i, x_i^+, x_j). \quad (18)$$

872 Then, the expectation value of the partial gradient of the contrastive learning loss  $\mathcal{L}$  on  $G_i$ 's represen-  
873 tation vector  $w_i$  brought by its positive instance  $x_j$  is composed of the following two items:

$$\mathbb{E} \left[ \frac{\partial \mathcal{L}_i}{\partial w_i} \right] (x_j) = -\frac{1}{\tau_t \|w_i\|_2} P_i^+(x_j) (z_j - (z_i^T z_j) z_i) (Q(x_i, x_j) + P(x_i, x_j)) \quad (19)$$

$$\mathbb{E} \left[ \frac{\partial \mathcal{L}_j}{\partial w_i} \right] = -\frac{1}{\tau_t \|w_i\|_2} P_j^+(x_i) (z_j - (z_i^T z_j) z_i) Q(x_j, x_i). \quad (20)$$

874 Following [17], we have:

$$\|z_j - (z_i^T z_j) z_i\| = \sqrt{1 - (z_i^T z_j)^2}, \quad (21)$$

875 which indicates that the magnitude of the partial gradient of contrastive learning loss on instance  $x_i$ 's  
876 representation vector  $w_i$  from its positive instance  $x_j$  is relevant with the cosine similarity  $(z_i^T z_j)$   
877 between their representation vectors.

878 Then, what we wish to explain here is that false-positive instances may have negative impact on the  
879 ability of the network to converge to the optimal state, which can be reached if we have the knowledge  
880 of each graph instance's ground-truth semantic class in the pre-training dataset.

881 Let us assume that we have arrived at a training stage where the network has been optimized to  
882 a near-optimal state such that the cosine similarity between positive instance pairs' representation  
883 vectors are relatively high (i.e.,  $z_i^T z_i^+ \approx 1$ ), while those between negative instance pairs are relatively  
884 low (i.e.,  $z_i^T z_i^- \approx 0$ ). In this stage, the magnitude of the contrastive learning loss's gradient on  
885 instance  $x_i$ 's representation vector  $w_i$  from its ground-truth positive instance  $x_i^+$  may be relatively  
886 low given that  $z_i^T z_i^+ \approx 1$ . However, the magnitude of such gradient from its false-positive instance  
887  $x_j$  may be relatively high since  $z_i^T z_j \approx 0$ . Thus, the direction of  $\frac{\partial \mathcal{L}}{\partial w_i}$  will be closer to that of  
888  $z_j - (z_i^T z_j) z_i$ . It may be a bit deviated from the direction of the gradient from its ground-truth  
889 positive instance  $z_i^+$  since:

$$(z_i^+ - (z_i^T z_i^+) z_i)^T (z_j - (z_i^T z_j) z_i) = z_i^{+T} z_j - z_i^{+T} z_i z_j^T z_i, \quad (22)$$

890 which is near to zero since  $z_i^T z_j \approx 0$  and  $z_i^{+T} z_i \approx 1$ .

891 Such near orthogonal optimization direction implies the incorrect optimization direction and the  
892 unstable training process.

### 893 **B.3 Higher similarity score may indicate higher probability to be a ground-truth positive** 894 **instance**

895 In this section, we want to investigate into whether it is reasonable to give graph instances that have  
896 higher similarity scores with the target graph instance  $G$  larger probability to be sampled as its  
897 positive instances. We aim to find a similarity score interval such that graph instances that have larger  
898 similarity scores with  $G_i$  means they also have higher probability to be  $G_i$ 's ground-truth positive  
899 instances when their similarity scores are changing in such an interval.

900 Assume that we observe an instance  $G_j$  whose similarity score with the target instance  $G_i$  is  $x$ , denote  
901 the event that  $G_j$  is a ground-truth positive instance of  $G_i$  as  $A$  and the event that  $G_j$  is a negative  
902 instance of  $G_i$  as  $B$ . Then,

$$P(\text{sim}(G_i, G_j) = x | A) = f_i^+(x) \delta x \quad (23)$$

$$P(\text{sim}(G_i, G_j) = x | B) = f_i^-(x) \delta x, \quad (24)$$

where  $0 < \delta x \ll 1$  is a small quantity,  $\text{sim}(\cdot, \cdot)$  is the similarity score function we use in practice,  $f_i^+(\cdot)$  and  $f_i^-(\cdot)$  are the corresponding similarity score probability density functions over  $G_i$ 's ground-truth positive instance set  $\mathcal{G}_i^{\text{gt}+}$  and its negative instance set  $\mathcal{G}_i^{\text{gt}-}$ .

Assume that we have no prior knowledge of the relationship between  $G_i$  and  $G_j$ , which means that  $P(A) = P(B) = \frac{1}{2}$ . Then, the posterior probabilities of the occurrence of the event  $A$  and  $B$  are as follows:

$$P(A|\text{sim}(G_i, G_j) = x) = \frac{f_i^+(x)\delta x}{f_i^+(x)\delta x + f_i^-(x)\delta x} = \frac{f_i^+(x)}{f_i^+(x) + f_i^-(x)} \quad (25)$$

$$P(B|\text{sim}(G_i, G_j) = x) = \frac{f_i^-(x)\delta x}{f_i^+(x)\delta x + f_i^-(x)\delta x} = \frac{f_i^-(x)}{f_i^+(x) + f_i^-(x)}. \quad (26)$$

The derivative of  $P(A|\text{sim}(x_i, x_j) = x)$  with respect to the similarity score  $x$  is:

$$P(A|\text{sim}(x_i, x_j) = x)' = \frac{f_i^{+'}(x)f_i^-(x) - f_i^{-'}(x)f_i^+(x)}{(f_i^+(x) + f_i^-(x))^2}. \quad (27)$$

We wish to find the monotonic non-decreasing interval of  $P(A|\text{sim}(x_i, x_j) = x)$  w.r.t. the similarity score  $x$ . The existence of such interval indicates that it is reasonable to give graphs instances that have higher similarity scores with the target instance larger probability to be selected as its positive instances.

The question can be further changed to finding the similarity score interval where  $\frac{f_i^{+'}(x)}{f_i^+(x)} > \frac{f_i^{-'}(x)}{f_i^-(x)}$  holds. Such interval may be determined by the shape of those two probability density functions and their respective parameters. Let us consider a specific function cluster: the truncated re-normalized normal distribution density function cluster. We explain such functions by giving an example as follows. Consider the probability density function of a normal distribution:  $g_0(x) = \frac{1}{\sqrt{2\pi}\sigma} \exp\left(-\frac{(x-\mu)^2}{2\sigma^2}\right)$ , its truncated re-normalized density function over  $[0, 1]$  is  $g(x) = \frac{g_0(x)}{\int_0^1 g_0(x)dx}$ . It is obvious that  $\int_0^1 g(x)dx = 1$ . Consider the situation where both  $f_i^+(\cdot)$  and  $f_i^-(\cdot)$  are such truncated re-normalized normal distribution probability density functions with parameters  $(\mu_+, \sigma_+)$  for  $f_i^+(\cdot)$  and  $(\mu_-, \sigma_-)$  for  $f_i^-(\cdot)$ . It is naturally to assume that  $\mu_- < \mu_+$  to meet with the properties proposed in Def. 2. Thus, we have:

$$\frac{f_i^{+'}(x)}{f_i^+(x)} = -\frac{x - \mu_+}{\sigma_+^2} \quad (28)$$

$$\frac{f_i^{-'}(x)}{f_i^-(x)} = -\frac{x - \mu_-}{\sigma_-^2}. \quad (29)$$

Since we have no prior knowledge of the relationship between  $\sigma_+$  and  $\sigma_-$ , we discuss the existence of the non-decreasing similarity score interval w.r.t. the relationship between  $\sigma_+$  and  $\sigma_-$  as follows:

- Case 1. If  $\sigma_+ = \sigma_-$ , we have  $\frac{f_i^{+'}(x)}{f_i^+(x)} > \frac{f_i^{-'}(x)}{f_i^-(x)}$  for every  $0 \leq x \leq 1$ ;
- Case 2. If  $\sigma_+ < \sigma_-$ , which indicates that the similarity score distribution over the ground-truth graph instance set is more centralized,  $\frac{f_i^{+'}(x)}{f_i^+(x)} > \frac{f_i^{-'}(x)}{f_i^-(x)}$  can be satisfied when  $0 \leq x < \min\left(\frac{\sigma_-^2\mu_+ - \sigma_+^2\mu_-}{\sigma_-^2 - \sigma_+^2}, 1\right)$ ;
- Case 3. If  $\sigma_+ > \sigma_-$ ,  $\frac{f_i^{+'}(x)}{f_i^+(x)} > \frac{f_i^{-'}(x)}{f_i^-(x)}$  can be satisfied when  $\max\left(\frac{\sigma_+^2\mu_- - \sigma_-^2\mu_+}{\sigma_+^2 - \sigma_-^2}, 0\right) < x \leq 1$ .

The limitation here is that we restrict the shape of the similarity score possibility distribution density functions as well as the relationship between their parameters to arrive at the above conclusion. It is possible that similar conclusions can be arrived at when  $f_i^+(\cdot)$  and  $f_i^-(\cdot)$  are in other forms.

#### B.4 Sampling preference brought by the high-order graph sampling strategy

In this section, we want to discuss into the sampling preference brought by the high-order sampling process towards those graph instances that are high-order connected to the target graph instance,

including those graph instances that are both high-order connected and also lower-order connected to the target graph instance as well as those that are only high-order connected to the target graph instance.

The connectivity between two nodes in the graph is introduced as follows:

**Definition 3 (Connectivity).** Node  $n_i$  and node  $n_j$  is  $k$ -connected, if and only if there exists a loop-free path with length  $k$  between them. For such two nodes  $n_i$  and  $n_j$ , a node sequence  $n_0(= n_i), n_1, \dots, n_k(= n_j)$  can be found, where  $n_p \neq n_q, \forall p \neq q, 0 \leq p \leq k, 0 \leq q \leq k$ .  $k$  is a connectivity order between node  $n_i$  and node  $n_j$ .

We only take the second-order sampling strategy as an example here for its simplicity and generality. It is easy to generalize to high-order sampling strategy, since the properties of the high-order random walk, the high-order sampling strategy used in this paper, have been researched and discussed thoroughly. The ratio for selecting each first-order neighbour  $G_j \in \mathcal{G}_i^{\text{sim}+}$  of the graph instance  $G_i$  when using the first-order sampling strategy is:

$$P_i^+(x_j) = \frac{\text{sim}(G_i, G_j)}{\sum_{G_k \in \mathcal{G}_i^{\text{sim}+} \text{sim}(G_i, G_k)}. \quad (30)$$

For each graph instance  $G_i^- \in \mathcal{G} \setminus \mathcal{G}_i^{\text{sim}+}$ , we have  $P_i^+(x_i^-) = 0$ .

When using second-order sampling strategy, the corresponding sampling ratio is proportional to:

$$\hat{P}_i^{2+}(x_j) = P_i^+(x_j) + \sum_{G_k \in \mathcal{G}_i^{\text{sim}+}} P_i^+(x_k) P_k^+(x_j), \quad (31)$$

for each  $G_j \in \mathcal{G}$ .

Obviously, second-order sampling strategy gives larger preference for  $G_i$ 's first-order neighbours that are also 2-connected to  $G_i$  than its neighbours that are only 1-connected to  $G_i$ , compared with the first-order sampling strategy<sup>11</sup>.

**Experimental evidence.** Such sampling preference to 2-connected first-order neighbours can be verified by simple experimental results from the following aspects: 1). Similarity scores between  $G_i$ 's first-order neighbours that are connected to each other selected by the second-order sampling strategy should be higher than that resulted by the first-order sampling strategy. It is because that if second-order sampling strategy tends to select 2-connected first-order neighbours more than only 1-connected neighbours, it is more likely that the chosen first-order neighbours are also connected with each other when using the second-order sampling strategy. It can be verified by experimental results shown in Table 19, the sampled first-order neighbours are more likely to be connected to each other and also more similar with each other when using second-order sampling strategy than using first-order sampling strategy. 2). Sampled first-order neighbours tend to be more similar with the target graph instance when using second-order sampling strategy than using first-order sampling strategy. It is not a straightforward conclusion that can be drawn by analyzing the sampling preference of the second-order sampling strategy for different kinds of neighbours, but can be seen from the experimental results (see the column "Target Sim." in Table 19). Thus, the second-order sampling strategy may also tend to sample more similar first-order neighbours, which may be more likely to be ground-truth positive instances.

However, second-order sampling also leads to the possibility to sample neighbours that are only 2-connected to the target graph instance, whose sampling rates are proportional to:

$$\hat{P}_i^{2+}(x_j) = \sum_{G_k \in \mathcal{G}_i^{\text{sim}+}} P_i^+(x_k) P_k^+(x_j). \quad (32)$$

Since such instances that are only 2-connected to the target graph instances are more likely to be false-positive instances, high-order sampling strategy may increase the risk of sampling false-positive instances.

<sup>11</sup>Note that this does not mean that the sampling ratio for neighbours that are both 1-connected and 2-connected to  $G_i$  is larger than that for neighbours that are only 1-connected to  $G_i$ .

Table 19: Statistical results for similarity scores within sampled positive instances, similarity scores for sampled positive instances with the target graph instance and the ratio of sampled positive instances connected to each other. Results for first-order neighbourhood sampling strategy and second-order sampling strategy are presented in the table, where only sampled first-order neighbours are chosen for calculation. In the experiment, we uniformly randomly sample 1000 molecules from the pre-training dataset and calculate the mean value of those three values. Three independent experiments were performed with mean and standard deviation values reported. Values presented in the table have the format mean  $\pm$  std. For abbreviations used, “Inter-pos. Sim.” denotes the similarity scores within sampled positive instances, “Target Sim.” denotes the similarity scores for sampled instances with the target graph instance.

|              | Inter-pos. Sim.     | Target Sim.         | Connected Ratio     |
|--------------|---------------------|---------------------|---------------------|
| First-order  | 0.4552 $\pm$ 0.0026 | 0.4766 $\pm$ 0.0035 | 0.6171 $\pm$ 0.0108 |
| Second-order | 0.4687 $\pm$ 0.0057 | 0.4831 $\pm$ 0.0022 | 0.6857 $\pm$ 0.0302 |

## B.5 Sampling bias brought by the approximate similarity score function

In this section, we want to discuss the possible sampling bias brought by the approximate similarity score function. The sampling bias may exist in two aspects: 1). Graph instance  $G_i$ ’s ground-truth positive instances that have higher similarity scores with  $G_i$  will enjoy larger sampling preference. Moreover,  $G_i$ ’s ground-truth positive instances with relatively low similarity scores are failed to be selected as its positive instances. However, they should be sampled equally when using the ground-truth similarity score function. 2). It is possible that  $G_i$ ’s negative instances that have relatively high similarity scores could be selected as its positive instances.

If we denote  $P_i^{\text{gt}+}(\cdot)$  as graph  $G_i$ ’s ground-truth positive sampling ratio function, then  $G_i$ ’s positive sampling bias when using the approximate similarity function from the ground-truth similarity function is defined as:

$$\text{bias}_i^\tau = \sum_{G_k \in \mathcal{G}} |P_i^+(x_k) - P_i^{\text{gt}+}(x_k)| \quad (33)$$

$$= \sum_{G_k \in \mathcal{G}_i^{\text{gt}+}} |P_i^+(x_k) - P_i^{\text{gt}+}(x_k)| + \sum_{G_k \in \mathcal{G}_i^{\text{gt}-}} |P_i^+(x_k) - P_i^{\text{gt}+}(x_k)| \quad (34)$$

$$= \text{gap}_i^\tau + \text{risk}_i^\tau. \quad (35)$$

$\text{gap}_i^\tau$  and  $\text{risk}_i^\tau$  are the functions of  $f_i^+(\cdot)$ ,  $f_i^-(\cdot)$  and  $\tau$ :

$$\text{gap}_i^\tau = |\mathcal{G}_i^{\text{gt}+}| \int_0^\tau \frac{f_i^+(x)}{|\mathcal{G}_i^{\text{gt}+}|} dx + |\mathcal{G}_i^{\text{gt}+}| \int_\tau^1 \left| \frac{x}{\text{totsim}_\tau} - \frac{1}{|\mathcal{G}_i^{\text{gt}+}|} \right| f_i^+(x) dx \quad (36)$$

$$\text{risk}_i^\tau = |\mathcal{G}_i^{\text{gt}-}| \frac{\int_\tau^1 x f_i^-(x) dx}{\text{totsim}_\tau}, \quad (37)$$

where  $\text{totsim}_\tau = |\mathcal{G}_i^{\text{gt}+}| \int_\tau^1 x f_i^+(x) dx + |\mathcal{G}_i^{\text{gt}-}| \int_\tau^1 x f_i^-(x) dx$  is the sum of the similarity scores over  $G_i$ ’s positive instance candidates. Assume that:

- Ground-truth positive instances would always not be explored thoroughly, which means that

$$P_i^+(x_k) = \frac{\text{sim}(x_i, x_k)}{\text{totsim}_\tau} > \frac{1}{|\mathcal{G}_i^{\text{gt}+}|} \text{ for each } G_k \in \mathcal{G}_i^{\text{gt}+} \cap \mathcal{G}_i^{\text{sim}+}. \quad (38)$$

This assumption is reasonable, since

- $|\mathcal{G}_i^{\text{gt}+}| \gg |\mathcal{G}_i^{\text{sim}+}|$ , considering that the pre-training dataset is always large and while  $|\mathcal{G}_i^{\text{sim}+}|$  is relatively small to reduce the similarity score computation budget for efficiency.

To meet with the assumption, we can further introduce  $\tau_3$  for each graph instance  $G_i$ , where  $\frac{\tau_3}{\text{totsim}_{\tau_3}} = \frac{1}{|\mathcal{G}_i^{\text{gt}+}|}$ , and restrict the similarity threshold  $\tau$  to  $\tau_3 < \tau < 1$  for each  $G_i$ ’s  $\tau_3$ .

Thus,  $\text{gap}_i^\tau$  becomes:

$$\text{gap}_i^\tau = |\mathcal{G}_i^{\text{gt}+}| \int_0^\tau \frac{f_i^+(x)}{|\mathcal{G}_i^{\text{gt}+}|} dx + |\mathcal{G}_i^{\text{gt}+}| \int_\tau^1 \left( \frac{x}{\text{totsim}_\tau} - \frac{1}{|\mathcal{G}_i^{\text{gt}+}|} \right) f_i^+(x) dx \quad (38)$$

$$= \left\{ \int_0^\tau f_i^+(x) dx - \int_\tau^1 f_i^+(x) dx \right\} + \left\{ |\mathcal{G}_i^{\text{gt}+}| \int_\tau^1 \frac{x f_i^+(x)}{\text{totsim}_\tau} dx \right\} \quad (39)$$

999 We denote such two items as  $\text{gap}_i^{\tau, \text{gt}} = \int_0^\tau f_i^+(x)dx - \int_\tau^1 f_i^+(x)dx$  and  $\text{gap}_i^{\tau, \text{sim}_\tau} = |\mathcal{G}_i^{\text{gt}+}| \cdot$   
1000  $\int_\tau^1 \frac{x f_i^+(x)}{\text{totsim}_\tau} dx$  respectively.

1001 If we assume that  $f_i^+(\cdot)$  and  $f_i^-(\cdot)$  are truncated re-normalized normal distribution functions  
1002 and further restrict the relationship between their parameters, we can show that  $\text{risk}_i^\tau$  increases  
1003 as the hreshold  $\tau$  increases, thus at the same time  $\int_\tau^1 \frac{x f_i^+(x)}{\text{totsim}_\tau} dx$  decreases as  $\tau$  increases since  
1004  $\frac{|\mathcal{G}_i^{\text{gt}+}| \int_\tau^1 x f_i^+(x) dx}{\text{totsim}_\tau} + \frac{|\mathcal{G}_i^{\text{gt}-}| \int_\tau^1 x f_i^-(x) dx}{\text{totsim}_\tau} = 1$ , though may not that intuitive:

$$\text{risk}_i^\tau = \frac{|\mathcal{G}_i^{\text{gt}-}| \int_\tau^1 x f_i^-(x) dx}{|\mathcal{G}_i^{\text{gt}-}| \int_\tau^1 x f_i^-(x) dx + |\mathcal{G}_i^{\text{gt}+}| \int_\tau^1 x f_i^+(x) dx} \quad (40)$$

$$\frac{\partial \text{risk}_i^\tau}{\partial \tau} = \frac{|\mathcal{G}_i^{\text{gt}+}| |\mathcal{G}_i^{\text{gt}-}| \tau (f_i^+(\tau) \int_\tau^1 x f_i^-(x) dx - f_i^-(\tau) \int_\tau^1 x f_i^+(x) dx)}{(|\mathcal{G}_i^{\text{gt}-}| \int_\tau^1 x f_i^-(x) dx + |\mathcal{G}_i^{\text{gt}+}| \int_\tau^1 x f_i^+(x) dx)^2}, \quad (41)$$

1005 where the sign of  $\frac{\partial \text{risk}_i^\tau}{\partial \tau}$  is determined by the sign of  $f_i^+(\tau) \int_\tau^1 x f_i^-(x) dx - f_i^-(\tau) \int_\tau^1 x f_i^+(x) dx$ .  
1006 For  $f_i^+(\cdot)$ 's parameters  $(\mu_+, \sigma_+)$  and  $f_i^-(\cdot)$ 's parameters  $(\mu_-, \sigma_-)$ , we assume that  $\sigma_+ = \sigma_- =$   
1007  $\sigma, \mu_+ > \mu_-$ . Thus,

$$\frac{\int_\tau^1 x f_i^-(x) dx}{f_i^-(\tau)} = \frac{\int_\tau^1 x \exp\left(\frac{(x-\mu_-)^2}{2\sigma^2}\right) dx}{\exp\left(\frac{(\tau-\mu_-)^2}{2\sigma^2}\right)} = \int_\tau^1 x \exp\left(\frac{x^2 - 2\mu_-(x-\tau) - \tau^2}{2\sigma^2}\right) dx \quad (42)$$

$$\frac{\int_\tau^1 x f_i^+(x) dx}{f_i^+(\tau)} = \frac{\int_\tau^1 x \exp\left(\frac{(x-\mu_+)^2}{2\sigma^2}\right) dx}{\exp\left(\frac{(\tau-\mu_+)^2}{2\sigma^2}\right)} = \int_\tau^1 x \exp\left(\frac{x^2 - 2\mu_+(x-\tau) - \tau^2}{2\sigma^2}\right) dx. \quad (43)$$

1008 We have,

$$\int_\tau^1 x \exp\left(\frac{x^2 - 2\mu_-(x-\tau) - \tau^2}{2\sigma^2}\right) dx > \int_\tau^1 x \exp\left(\frac{x^2 - 2\mu_+(x-\tau) - \tau^2}{2\sigma^2}\right) dx \quad (44)$$

1009 since  $x - \tau \geq 0, \forall \tau \leq x \leq 1$  and  $\mu_- < \mu_+$ .

1010 Thus,  $\text{gap}_i^{\tau, \text{gt}}$  and  $\text{risk}_i^\tau$  decrease as  $\tau$  decreases, while  $\text{gap}_i^{\tau, \text{sim}_\tau}$  increases as  $\tau$  decreases. Though it  
1011 is hard to detect the monotonicity of  $\text{gap}_i^\tau$ , we can get a sense that there exists a balance between  
1012 minimizing  $\text{gap}_\tau$  and  $\text{risk}_\tau$ .

1013 A limitation that must be pointed out about the above conclusion, including the monotonicity of each  
1014 part in  $\text{gap}_i^\tau$  and  $\text{risk}_i^\tau$ , is arrived by assuming the similarity possibility density functions  $f_i^+(\cdot)$  and  
1015  $f_i^-(\cdot)$  are chosen from a certain function cluster and further restricting the relationship between their  
1016 parameters. Thus, the above conclusion only aims at giving a glimpse into the potential balance  
1017 existing in the sampling bias brought by the approximate similarity function over the ground-truth  
1018 positive instances and negative instances.

1019 Though it seems that the high-order sampling strategy is not taken into consideration in the above  
1020 discussion, it can be naturally integrated in since the positive similarity threshold  $\tau$  is lowered in the  
1021 high-order sampling process. Moreover, the abstracted similarity threshold  $\tau$  implies that we can  
1022 probably reach a good balance point, which may be determined by the specific application scenario,  
1023 by tuning the similarity score threshold  $\tau$  directly or changing the positive instance sampling strategy.

## 1024 C Broader Impact

1025 In this paper, we have developed a sampling based graph positive instance selection strategy (HGC)  
1026 that can be used in the graph contrastive learning process. Compared with previous approaches,  
1027 where positive instances for the target graph instance are obtained by performing data augmentation  
1028 skills on the target graph instance, our sampling based process can ultimately get positive graph  
1029 instances of better quality keeping enough similarity with the target graph instance and also within  
1030 different positive graph instances. Such a sampling process can also ensure the necessary domain  
1031 specific information preserved in the resulting positive instances. We also propose an improvement



1032 on a widely used node-level pre-training strategy (AdaM), leading to masked nodes distributed more  
1033 evenly on the graph. Moreover, we discover the potential possibility of the pre-trained GNN models  
1034 to perform cross-domain transferring.

1035 It seems that there are no explicit relationship between our graph-level similarity based positive  
1036 instance sampling strategy and our improvement for the widely used attribute masking pre-training  
1037 strategy. However, we want to point out that their design principles point towards a higher methodol-  
1038 ogy design philosophy. That is, introducing prior knowledge into methods that are originally random  
1039 ones can help us get better results. Specifically, we introduce the approximate pair-wise similarity  
1040 information which can help us sample positive instances of better quality. By comparison, previous  
1041 methods always tend to use data augmentation methods to construct positive graph instances from the  
1042 target instance. Such strategies always introduce random factors to perturb the structure and attribute  
1043 information in the graph. Those random factors may destruct necessary information that should be  
1044 kept in the positive instances. Admittedly, it is also possible to design data augmentation strategies  
1045 that are aware of such information to preserve them in the resulting graph instances. However, it will  
1046 turn out to be a complex strategy with many restrictions on the augmentation process. The advantage  
1047 of our HGC is then obvious – it keeps such necessary information in the positive samples by sampling  
1048 from existing graphs with some deterministic factors fused into the sampling process automatically  
1049 (transition probability from one node in the graph to another node is calculated by their pair-wise  
1050 similarity score). Thus, it is a more effective, efficient and elegant solution for such a crucial problem  
1051 existing in contrastive learning for graph data.

1052 Our adaptive masking strategy tries to select nodes based on their perturbation scores, which ultimately  
1053 leads to nodes selected distributed more evenly in the graph. It is inspired by Kmeans++ [2]. Though  
1054 we still aim at distributing nodes evenly in the graph, we approximately solve such a problem by  
1055 adding some deterministic factors (the sampling rates for remaining nodes are calculated based on  
1056 their perturbation scores) in the node selecting process, different from previous methods which just  
1057 selecting nodes according to a uniform distribution.

1058 The broader impact of our research can be summarized below:

- 1059 • **For machine learning community:** This work demonstrates the importance of designing ma-  
1060 chine learning strategies by thinking deeply into essential things that are most important to solve  
1061 the problem (e.g., how to ensure the enough similarity between positive instances and target  
1062 instances in our positive instance selection problem). The sampling based positive instance  
1063 selection process may probably inspire more novel graph instance pre-training strategies.  
1064 Moreover, we point out a potential new developing direction for pre-training on graph data. That  
1065 is, how can we obtain powerful universally transferrable pre-trained GNN models that can transfer  
1066 across different kinds of graphs? It is an interesting and also a valuable quation that deserves  
1067 further discussion.
- 1068 • **For the drug discovery community:** Researchers from the drug discovery community can  
1069 benefit from this work. It is because that the starting point of the design of HGC is the wish to  
1070 apply contrastive learning strategy on molecular graphs effectively, since previous approaches  
1071 may impede the development of contrastive learning for pre-training on molecular graphs, which  
1072 are kind of special graphs in the real-world. Thus, the contrastive learning using HGC for positive  
1073 instance sampling can help with developing GNN pre-training strategies. We hope that HGC can  
1074 help with boosting the performance of various drug discovery applications, such as molecular  
1075 property prediction and virtual screening.
